# Supplementary material for: Transmission of SARS-CoV-2 before and after symptom onset: impact of nonpharmaceutical interventions in China
Source: bioRxiv or medRxiv preprint supplement (doi:10.1101/2020.12.16.20214106), 2020-12-18
Supplement: Supplementary file [file media-1.pdf]

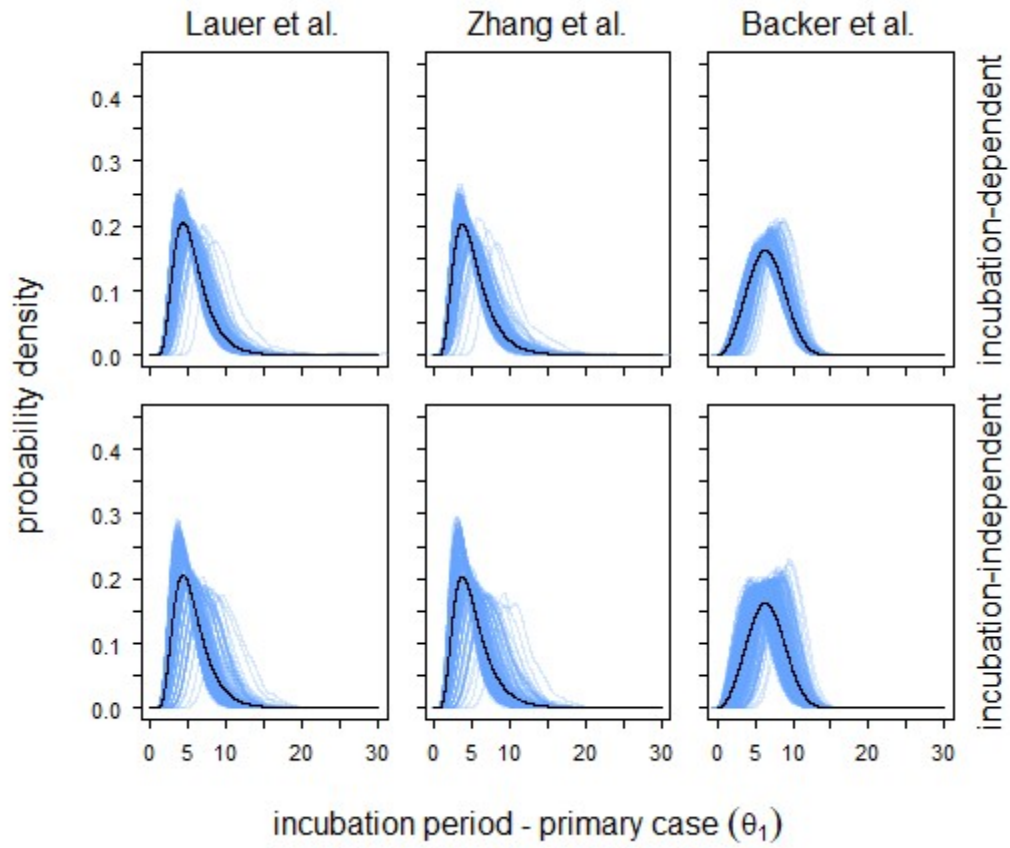

**Fig. S1** Overlaid posterior distributions for the incubation period of the primary case ( $\theta_1$ ) of each case pair in the pre-lockdown period. Black lines show the incubation period prior for each analysis.
