# Supplementary material for: Transmission of SARS-CoV-2 before and after symptom onset: impact of nonpharmaceutical interventions in China
Source: bioRxiv or medRxiv preprint supplement (doi:10.1101/2020.12.16.20214106), 2020-12-18
Supplement: Supplementary file [file media-6.pdf]

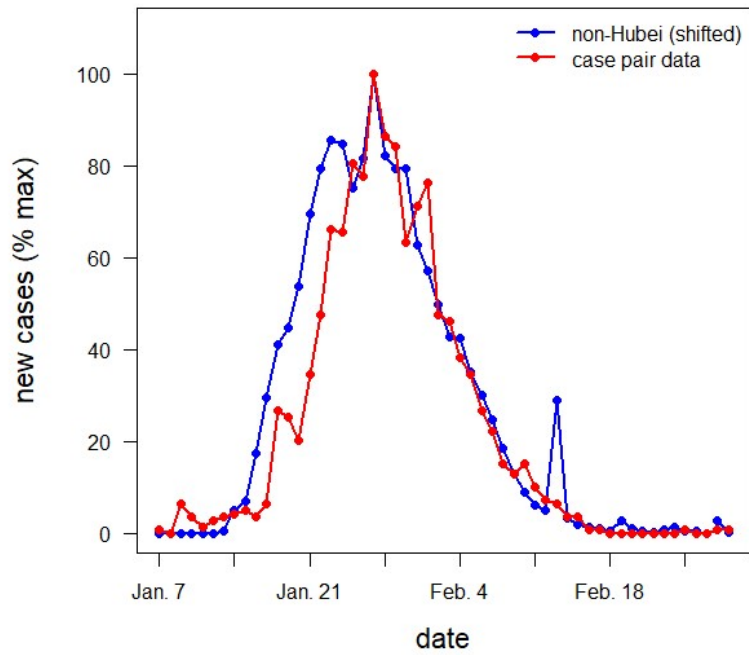

**Fig. S6** Case incidence based on case pairs (red) and non-Hubei cases (blue), with both curves scaled to their respective maximums and the non-Hubei incidence curve shifted 7 days to the left.
