# Supplementary material for: Transmission of SARS-CoV-2 before and after symptom onset: impact of nonpharmaceutical interventions in China
Source: bioRxiv or medRxiv preprint supplement (doi:10.1101/2020.12.16.20214106), 2020-12-18

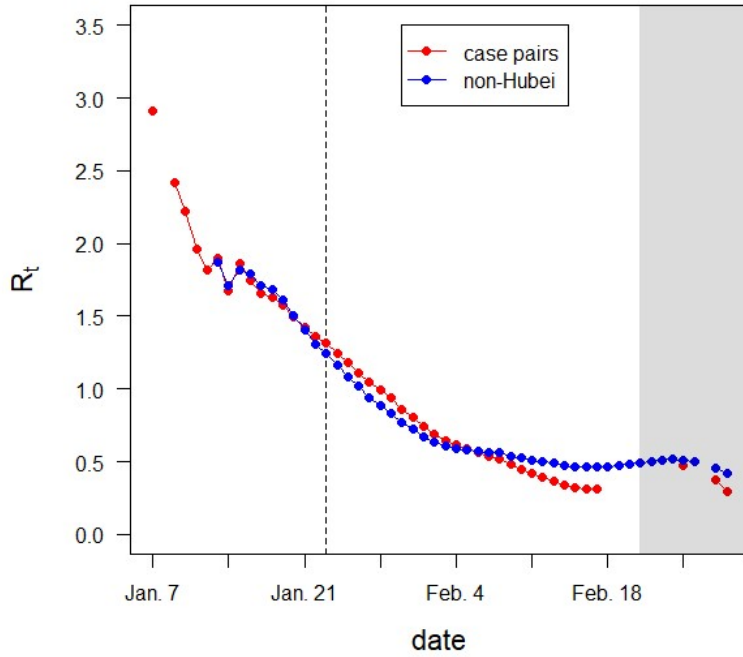

Supplement: Supplementary file [file media-7.pdf]
