# Supplementary material for: Transmission of SARS-CoV-2 before and after symptom onset: impact of nonpharmaceutical interventions in China
Source: bioRxiv or medRxiv preprint supplement (doi:10.1101/2020.12.16.20214106), 2020-12-18
Supplement: Supplementary file [file media-8.pdf]

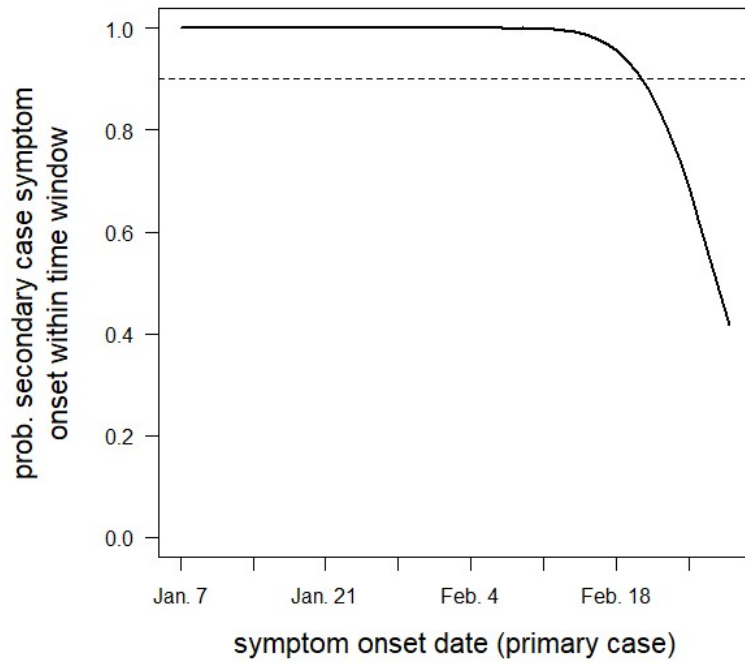

**Fig. S8** Probability of a secondary case developing symptoms by  $t_{max}$  (Feb. 29) vs. time of primary case symptom onset. Dashed line shows probability cutoff (0.9).
