# Supplementary material for: Transmission of SARS-CoV-2 before and after symptom onset: impact of nonpharmaceutical interventions in China
Source: bioRxiv or medRxiv preprint supplement (doi:10.1101/2020.12.16.20214106), 2020-12-18
Supplement: Supplementary file [file media-10.pdf]

|                              |           | Primary infection location |             |             |             |
|------------------------------|-----------|----------------------------|-------------|-------------|-------------|
| Secondary infection location |           | Hubei                      | Non-Hubei   | Unknown     | Marginal    |
|                              | Hubei     | 62 (7.1%)                  | 3 (0.3%)    | 1 (0.1%)    | 66 (7.6%)   |
|                              | Non-Hubei | 324 (37.1%)                | 356 (40.8%) | 55 (6.3%)   | 735 (84.2%) |
|                              | Unknown   | 11 (1.3%)                  | 8 (0.9%)    | 53 (6.1%)   | 72 (8.2%)   |
|                              | Marginal  | 397 (45.5%)                | 367 (42.0%) | 109 (12.5%) | 873 (100%)  |

**Table S1** Chinese provinces in which primary and secondary cases were presumed to be infected.
