# Supplementary material for: Transmission of SARS-CoV-2 before and after symptom onset: impact of nonpharmaceutical interventions in China
Source: bioRxiv or medRxiv preprint supplement (doi:10.1101/2020.12.16.20214106), 2020-12-18
Supplement: Supplementary file [file media-12.pdf]

| Time period   | Generation interval model | Incubation period prior |             |               |             |                | DIC  |
|---------------|---------------------------|-------------------------|-------------|---------------|-------------|----------------|------|
|               |                           |                         | <i>mean</i> | <i>95% CI</i> | <i>mean</i> | <i>95% CI</i>  |      |
| Pre-lockdown  | incubation-independent    | Lauer et al.            | 3.71        | (2.57, 4.99)  | 0.495       | (0.344, 0.666) | 2899 |
|               |                           | Zhang et al.            | 4.05        | (2.66, 6.68)  | 0.541       | (0.355, 0.886) | 2916 |
|               |                           | Backer et al.           | 3.99        | (2.72, 5.71)  | 0.527       | (0.362, 0.745) | 2983 |
|               | incubation-dependent      | Lauer et al.            | 2.87        | (2.12, 3.83)  | 2.09        | (1.49, 2.86)   | 2932 |
|               |                           | Zhang et al.            | 2.98        | (2.23, 3.87)  | 2.04        | (1.48, 2.73)   | 2955 |
|               |                           | Backer et al.           | 3.03        | (2.22, 4.00)  | 2.58        | (1.85, 3.41)   | 3005 |
| Post-lockdown | incubation-independent    | Lauer et al.            | 1.55        | (1.27, 1.91)  | 0.398       | (0.325, 0.490) | 8896 |
|               |                           | Zhang et al.            | 1.65        | (1.31, 2.06)  | 0.430       | (0.338, 0.543) | 8923 |
|               |                           | Backer et al.           | 1.51        | (1.23, 1.82)  | 0.382       | (0.313, 0.459) | 9190 |
|               | incubation-dependent      | Lauer et al.            | 1.25        | (1.05, 1.49)  | 1.73        | (1.43, 2.09)   | 8971 |
|               |                           | Zhang et al.            | 1.34        | (1.12, 1.60)  | 1.77        | (1.43, 2.15)   | 9014 |
|               |                           | Backer et al.           | 1.24        | (1.05, 1.45)  | 1.99        | (1.66, 2.37)   | 9222 |

**Table S3** Posterior means and 95% credible intervals for the parameters of the generation interval distribution, plus deviance information criterion (DIC) estimates for each model and each time period.
