# Supplementary material for: Transmission of SARS-CoV-2 before and after symptom onset: impact of nonpharmaceutical interventions in China
Source: bioRxiv or medRxiv preprint supplement (doi:10.1101/2020.12.16.20214106), 2020-12-18
Supplement: Supplementary file [file media-13.pdf]

| Time period   | Generation interval model | Incubation period prior | mean        |               | sd          |               |
|---------------|---------------------------|-------------------------|-------------|---------------|-------------|---------------|
|               |                           |                         | <i>mean</i> | <i>95% CI</i> | <i>mean</i> | <i>95% CI</i> |
| Pre-lockdown  | incubation-independent    | Lauer et al.            | 7.50        | (6.81, 8.20)  | 3.95        | (3.32, 4.74)  |
|               |                           | Zhang et al.            | 7.49        | (6.80, 8.22)  | 3.83        | (2.90, 4.65)  |
|               |                           | Backer et al.           | 7.58        | (6.90, 8.28)  | 3.86        | (3.18, 4.61)  |
|               | incubation-dependent      | Lauer et al.            | 7.63        | (6.89, 8.42)  | 5.99        | (5.14, 6.97)  |
|               |                           | Zhang et al.            | 7.62        | (6.87, 8.45)  | 6.28        | (5.41, 7.24)  |
|               |                           | Backer et al.           | 7.63        | (6.94, 8.38)  | 5.48        | (4.76, 6.34)  |
| Post-lockdown | incubation-independent    | Lauer et al.            | 3.90        | (3.59, 4.24)  | 3.15        | (2.78, 3.53)  |
|               |                           | Zhang et al.            | 3.84        | (3.49, 4.18)  | 3.01        | (2.60, 3.43)  |
|               |                           | Backer et al.           | 3.95        | (3.63, 4.30)  | 3.23        | (2.89, 3.61)  |
|               | incubation-dependent      | Lauer et al.            | 3.99        | (3.66, 4.34)  | 4.28        | (3.83, 4.77)  |
|               |                           | Zhang et al.            | 3.96        | (3.62, 4.32)  | 4.31        | (3.84, 4.85)  |
|               |                           | Backer et al.           | 4.04        | (3.71, 4.38)  | 4.14        | (3.73, 4.59)  |

**Table S4** Posterior means and 95% credible intervals for the mean and standard deviation of the generation interval distribution.
