# Supplementary material for: Transmission of SARS-CoV-2 before and after symptom onset: impact of nonpharmaceutical interventions in China
Source: bioRxiv or medRxiv preprint supplement (doi:10.1101/2020.12.16.20214106), 2020-12-18
Supplement: Supplementary file [file media-14.pdf]

| Generation interval model | Incubation period prior | Pre-lockdown |                | Post-lockdown |                |
|---------------------------|-------------------------|--------------|----------------|---------------|----------------|
|                           |                         | <i>mean</i>  | <i>95% CI</i>  | <i>mean</i>   | <i>95% CI</i>  |
| incubation-independent    | Lauer et al.            | 34.4%        | (28.3%, 41.3%) | 71.0%         | (67.6%, 74.2%) |
|                           | Zhang et al.            | 30.7%        | (24.0%, 37.7%) | 68.1%         | (64.5%, 71.7%) |
|                           | Backer et al.           | 43.7%        | (37.1%, 50.4%) | 77.5%         | (74.5%, 80.3%) |
| incubation-dependent      | Lauer et al.            | 37.8%        | (31.4%, 44.5%) | 75.1%         | (71.8%, 78.3%) |
|                           | Zhang et al.            | 34.1%        | (27.7%, 40.8%) | 73.2%         | (69.5%, 76.8%) |
|                           | Backer et al.           | 47.0%        | (40.2%, 53.7%) | 80.6%         | (77.6%, 83.5%) |

**Table S5** Posterior means and 95% credible intervals for the relative frequency of presymptomatic transmission during the pre-lockdown and post-lockdown periods.
