# Supplementary material for: Transmission of SARS-CoV-2 before and after symptom onset: impact of nonpharmaceutical interventions in China
Source: bioRxiv or medRxiv preprint supplement (doi:10.1101/2020.12.16.20214106), 2020-12-18
Supplement: Supplementary file [file media-15.pdf]

| Generation interval model | Incubation period prior | presymptomatic transmission |                  | transmission post-symptom onset |                  |
|---------------------------|-------------------------|-----------------------------|------------------|---------------------------------|------------------|
|                           |                         | <i>mean</i>                 | <i>95% CI</i>    | <i>mean</i>                     | <i>95% CI</i>    |
| incubation-independent    | Lauer et al.            | -15.5%                      | (-30.6%, +2.56%) | -82.0%                          | (-84.5%, -79.0%) |
|                           | Zhang et al.            | -8.62%                      | (-27.0%, +16.3%) | -81.3%                          | (-84.0%, -78.3%) |
|                           | Backer et al.           | -27.5%                      | (-37.9%, -15.1%) | -83.7%                          | (-86.3, -80.7%)  |
| incubation-dependent      | Lauer et al.            | -18.7%                      | (-31.8%, -2.11%) | -83.7%                          | (-86.3%, -80.7%) |
|                           | Zhang et al.            | -12.0%                      | (-27.6%, +7.51%) | -83.5%                          | (-86.1%, -80.5%) |
|                           | Backer et al.           | -29.9%                      | (-39.4%, -18.2%) | -85.1%                          | (-87.9%, -81.9%) |

**Table S6** Posterior means and 95% credible intervals for the % change in the absolute frequency of presymptomatic transmission and transmission post-symptom onset after the introduction of NPIs.
