# Supplementary material for: Transmission of SARS-CoV-2 before and after symptom onset: impact of nonpharmaceutical interventions in China
Source: bioRxiv or medRxiv preprint supplement (doi:10.1101/2020.12.16.20214106), 2020-12-18
Supplement: Supplementary file [file media-16.pdf]

| <b>Transmission type</b> | <b>Pre-lockdown</b> | <b>Post-lockdown</b> |
|--------------------------|---------------------|----------------------|
| Household                | 7                   | 35                   |
| Non-household            | 26                  | 53                   |
| Family                   | 81                  | 365                  |
| Non-family               | 71                  | 143                  |
| Imported                 | 126                 | 303                  |
| Non-imported             | 61                  | 292                  |

**Table S7** Numbers of six types of transmission events: attributable to household contact; attributable to non-household contact; between family members; between non-family members; imported (primary and secondary cases infected in different cities); non-imported (primary and secondary cases infected in the same city). Contact type, relationship, and infection location data were not available for all case pairs, so the totals for household/non-household (121), family/non-family (660), and imported/non-imported (782) are different from one another and less than the total number of case pairs (873).
